# Supplementary material for: Design, synthesis and mechanistic study of new benzenesulfonamide derivatives as anticancer and antimicrobial agents via carbonic anhydrase IX inhibition
Source: Royal Society of Chemistry journal article supplement (doi:10.1039/d1ra05277b), 2021-01-01
Supplement: d1ra05277b1.pdf [file d1ra05277b1.pdf]

Fig S1: Curves of proliferation against the three cell lines of all the synthesized compounds.

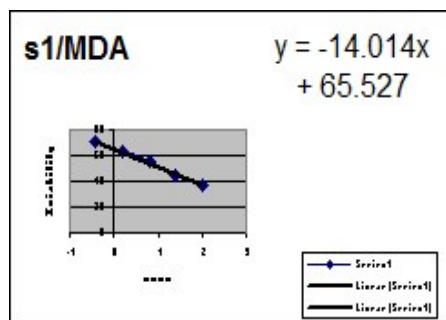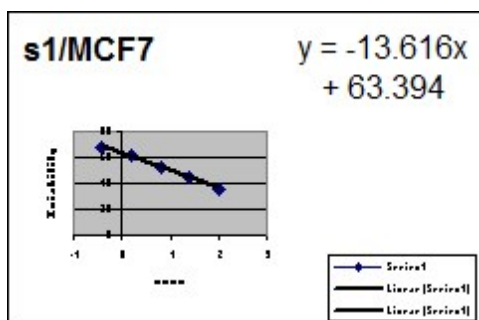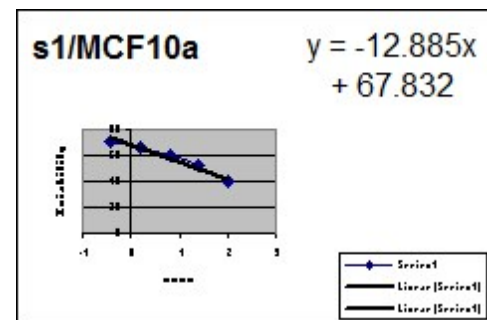

Curves of proliferation against the three cell lines of compound 4a.

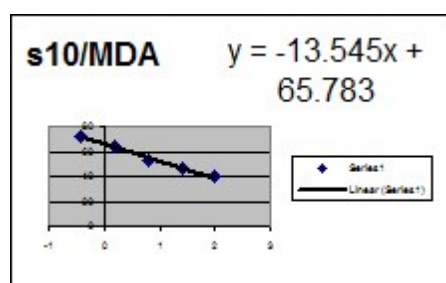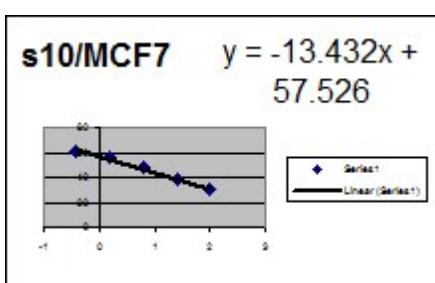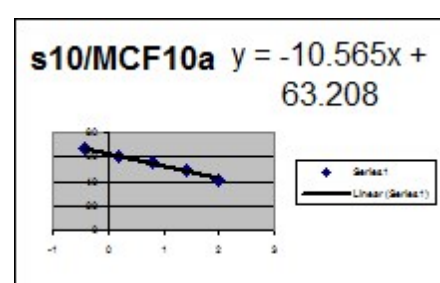

Curves of proliferation against the three cell lines of compound 4b.

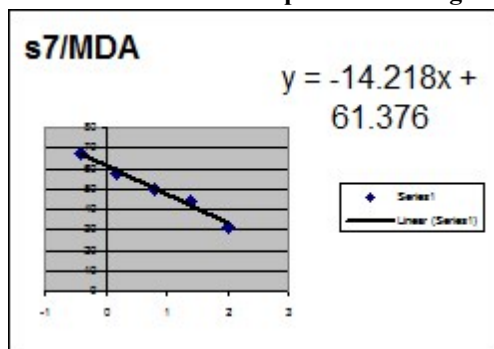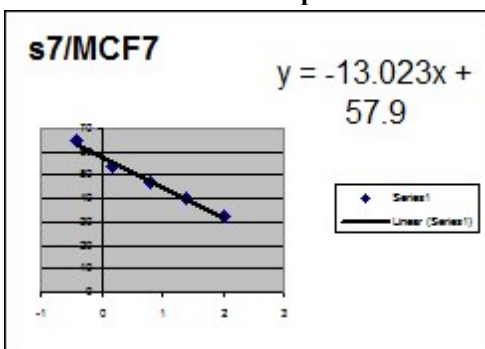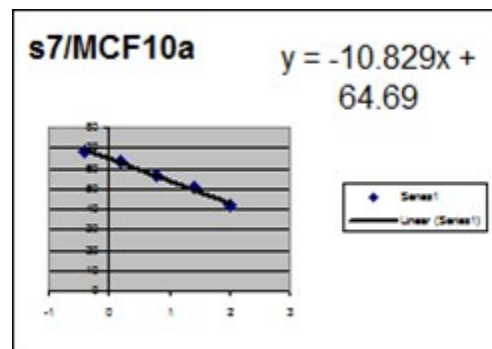

Curves of proliferation against the three cell lines of compound 4c.

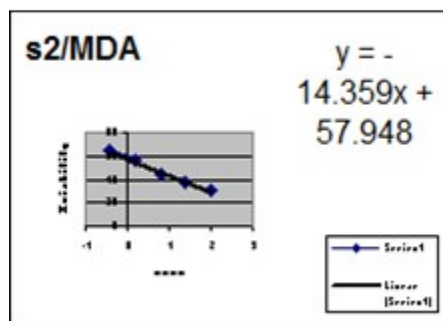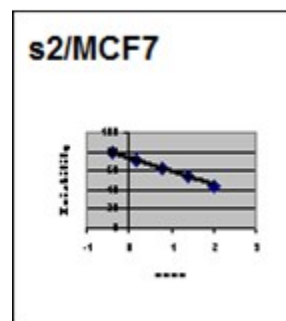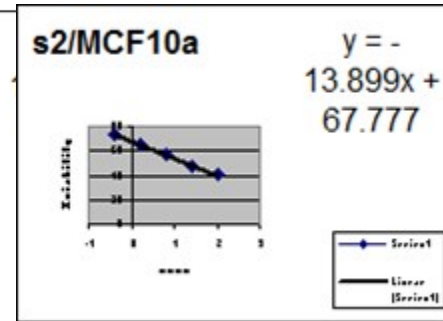

Curves of proliferation against the three cell lines of compound 4e.

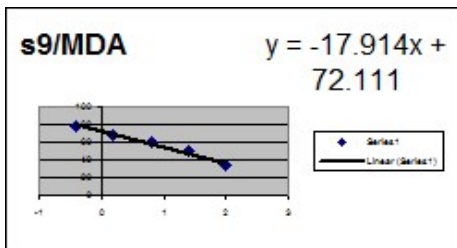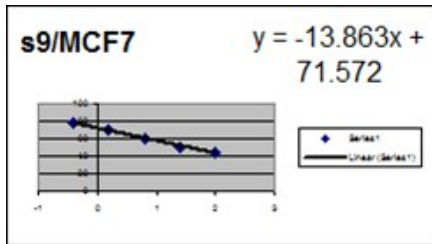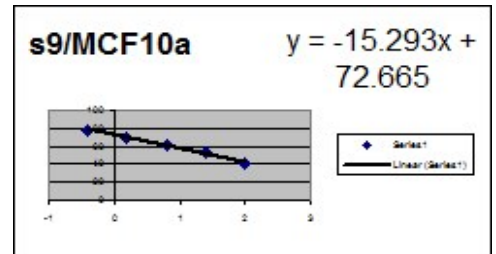

Curves of proliferation against the three cell lines of compound 4f.

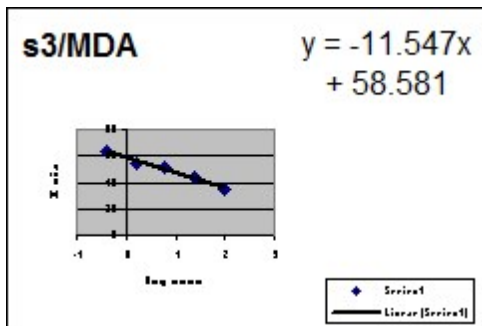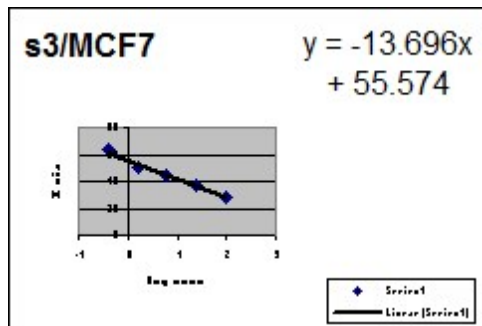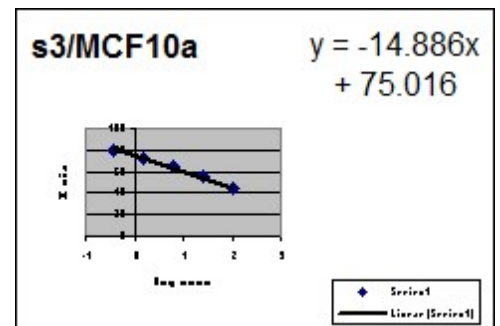

Curves of proliferation against the three cell lines of compound 4g.

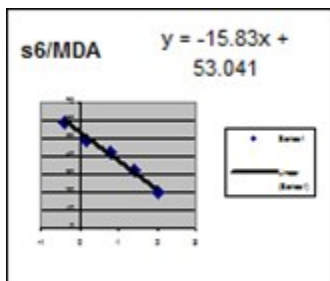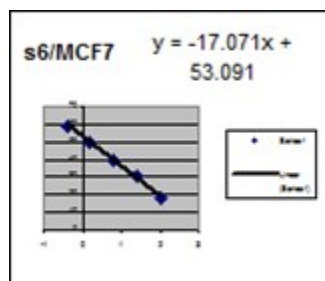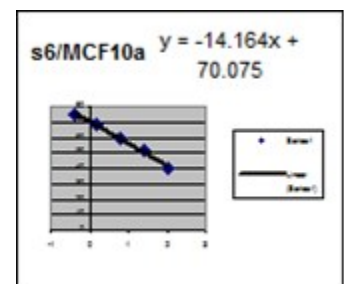

Curves of proliferation against the three cell lines of compound 4h.

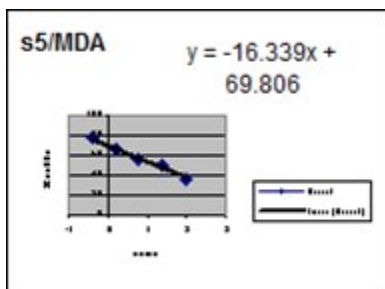

curves of proliferation against the three cell lines of compound 4i.

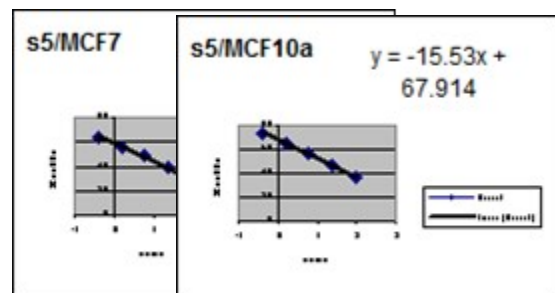

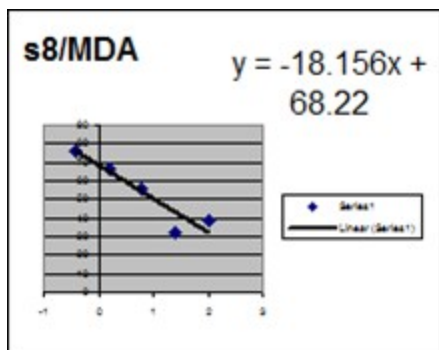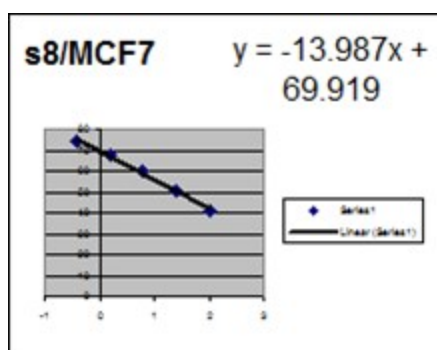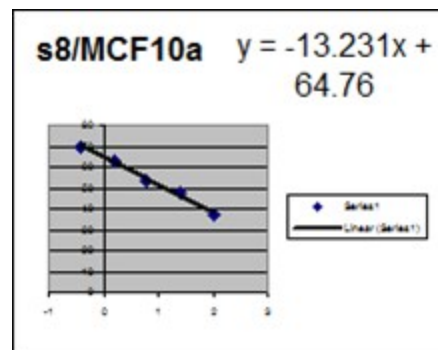

curves of proliferation against the three cell lines of compound 4j.

**Fig S2: The cellular uptake of compounds 4e and 4h by MDA-MB-231 cancer cell lines.**

**A**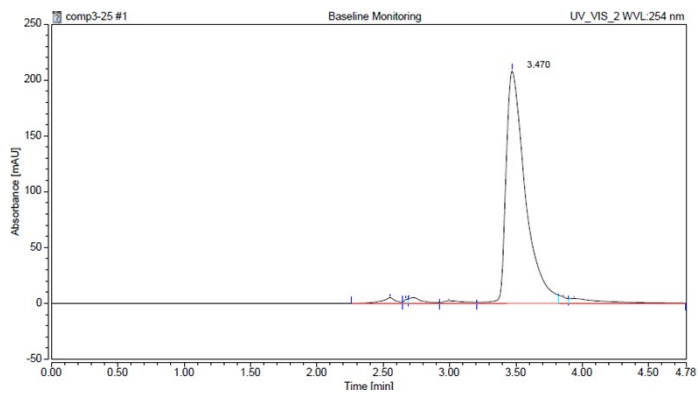**B**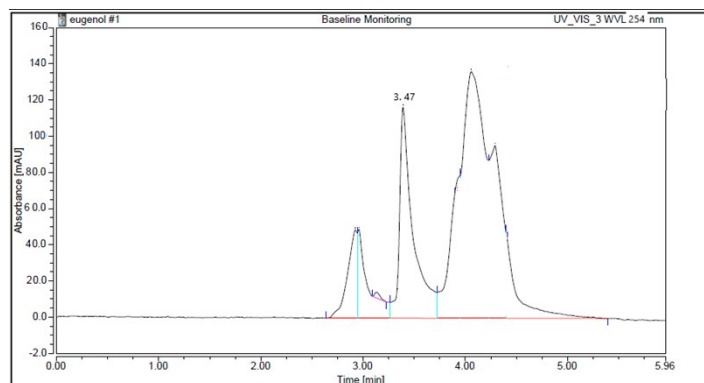**C**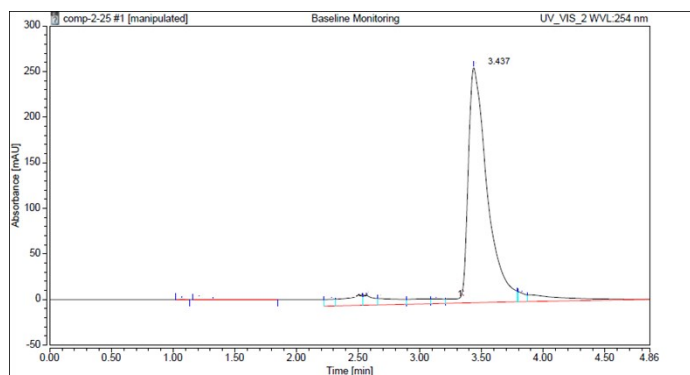**D**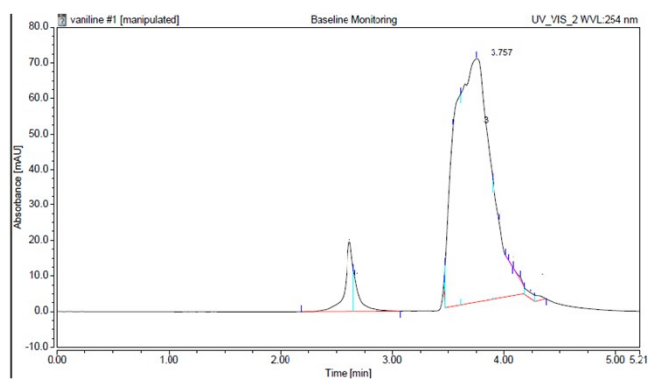

**HPLC chromatogram of (A) : compound 4e, (B) cellular uptake of compound 4e by MDA-MB-231 cancer cell line, (C): compound 4h, (D): cellular uptake of compound 4h by MDA-MB-231 cancer cell line.**

**Table S1: IC<sub>50</sub> of carbonic anhydrase IX enzyme inhibition of all the synthesized derivatives.**

| <b>Compound No.</b> | <b>CA IX IC<sub>50</sub> (nM)±S.D.</b> |
|---------------------|----------------------------------------|
| <b>4a</b>           | <b>338±16.5</b>                        |
| <b>4b</b>           | <b>203.3±9.93</b>                      |
| <b>4c</b>           | <b>31.68±1.55</b>                      |
| <b>4d</b>           | <b>135.8±6.63</b>                      |
| <b>4e</b>           | <b>10.93±0.53</b>                      |
| <b>4f</b>           | <b>122.14±4.08</b>                     |
| <b>4g</b>           | <b>16.96±0.83</b>                      |
| <b>4h</b>           | <b>25.56±1.25</b>                      |
| <b>4i</b>           | <b>39.51±1.93</b>                      |
| <b>4j</b>           | <b>76.1±3.71</b>                       |
| <b>Dorzolamide</b>  | <b>8.83±0.43</b>                       |
| <b>SLC-0111</b>     | <b>4.5<sup>18</sup></b>                |

**S.D.** : Standard Deviation

| Table                                             | Property                                               | Compound   | Compound   | Compound   | S2: |
|---------------------------------------------------|--------------------------------------------------------|------------|------------|------------|-----|
|                                                   |                                                        | 4e         | 4g         | 4h         |     |
| ADMET                                             | <b>Lipophilicity</b><br>(Log p)                        | 2.859      | 2.324      | 2.130      |     |
|                                                   | <b>Absorption</b>                                      |            |            |            |     |
|                                                   | Water Solubility (log mol/L)                           | -3.867     | -4.323     | -3.496     |     |
|                                                   | Caco2 permeability (log Papp in 10 <sup>-6</sup> cm/s) | 0.222      | 0.045      | 0.176      |     |
|                                                   | Intestinal absorption (%)                              | 73.743     | 81.72      | 77.04      |     |
|                                                   | Skin permeability (log Kp)                             | -2.752     | -2.749     | -2.916     |     |
|                                                   | P-glycoprotein substrate                               | <b>Yes</b> | <b>Yes</b> | <b>Yes</b> |     |
|                                                   | P-glycoprotein I                                       | <b>Yes</b> | <b>Yes</b> | <b>Yes</b> |     |
|                                                   | P-glycoprotein II                                      | <b>No</b>  | <b>No</b>  | <b>No</b>  |     |
|                                                   | <b>Distribution</b>                                    |            |            |            |     |
|                                                   | VDss (log L/kg)                                        | 0.047      | -0.642     | -0.21      |     |
|                                                   | Fraction unbound (Fu)                                  | 0.069      | 0          | 0.102      |     |
|                                                   | BBB permeability (log BB)                              | -1.154     | -1.047     | -1.134     |     |
|                                                   | CNS permeability (log PS)                              | -2.579     | -2.561     | -2.648     |     |
|                                                   | <b>Metabolism</b>                                      |            |            |            |     |
|                                                   | CYP2D6 substrate                                       | <b>No</b>  | <b>No</b>  | <b>No</b>  |     |
|                                                   | CYP3A4 substrate                                       | <b>Yes</b> | <b>Yes</b> | <b>Yes</b> |     |
|                                                   | CYP1A2 inhibitor                                       | <b>No</b>  | <b>No</b>  | <b>No</b>  |     |
|                                                   | CYP2C19 inhibitor                                      | <b>Yes</b> | <b>No</b>  | <b>No</b>  |     |
|                                                   | CYP2C9 inhibitor                                       | <b>Yes</b> | <b>No</b>  | <b>No</b>  |     |
|                                                   | CYP2D6 inhibitor                                       | <b>No</b>  | <b>No</b>  | <b>No</b>  |     |
|                                                   | CYP3A4 inhibitor                                       | <b>No</b>  | <b>Yes</b> | <b>No</b>  |     |
|                                                   | <b>Excretion</b>                                       |            |            |            |     |
|                                                   | Total Clearance (log ml/min/kg)                        | -0.373     | -0.477     | -0.366     |     |
|                                                   | Renal OCT2 substrate                                   | <b>No</b>  | <b>No</b>  | <b>Yes</b> |     |
|                                                   | <b>Toxicity</b>                                        |            |            |            |     |
|                                                   | AMES toxicity                                          | <b>No</b>  | <b>No</b>  | <b>No</b>  |     |
| Max. tolerated dose (log mg/kg/day)               | -0.473                                                 | -0.339     | -0.539     |            |     |
| hERG I inhibitor                                  | <b>No</b>                                              | <b>No</b>  | <b>No</b>  |            |     |
| hERG II inhibitor                                 | <b>Yes</b>                                             | <b>No</b>  | <b>No</b>  |            |     |
| Oral Rat Acute Toxicity (LD50) (mol/kg)           | 2.517                                                  | 2.258      | 1.985      |            |     |
| Oral Rat Chronic Toxicity (LOAEL) (mol/kg_bw/day) | 1.523                                                  | 1.316      | 2.221      |            |     |
| Hepatotoxicity                                    | <b>Yes</b>                                             | <b>No</b>  | <b>No</b>  |            |     |

properties of the synthesized compounds.

|                                            |           |           |           |
|--------------------------------------------|-----------|-----------|-----------|
| Skin Sensitisation                         | <b>No</b> | <b>No</b> | <b>No</b> |
| <i>T.Pyriformis</i> toxicity<br>(log µg/L) | 0.369     | 0.347     | 0.606     |
| Minnow toxicity<br>(log mM)                | 0.205     | 0.091     | 0.514     |

# NMR Spectrum for compound 4b

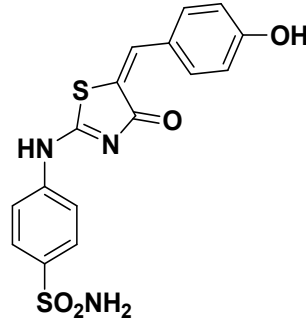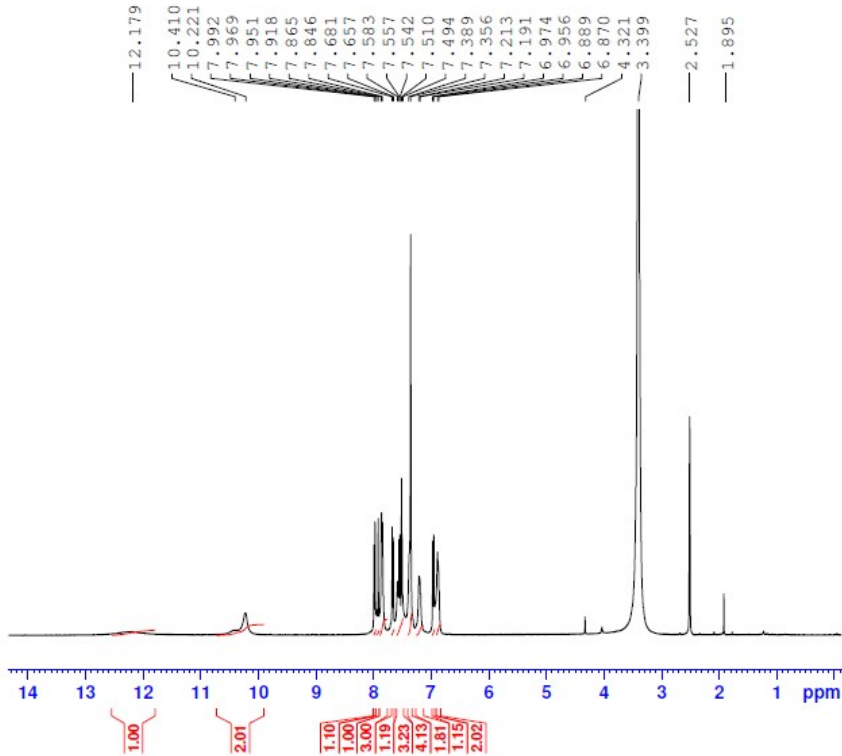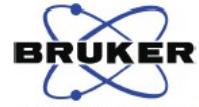

Current Data Parameters  
 NAME asmaa-magd-4H  
 EXPNO 1  
 PROCNO 1

F2 - Acquisition Parameters  
 Date\_ 20200504  
 Time 8.57  
 INSTRUM spect  
 PROBHD 5 mm PABBO BB/  
 PULPROG zg30  
 TD 65536  
 SOLVENT DMSO  
 NS 61  
 DS 2  
 SWH 8012.820 Hz  
 FIDRES 0.122266 Hz  
 AQ 4.0894465 sec  
 RG 205.37  
 DW 62.400 usec  
 DE 6.50 usec  
 TE 300.0 K  
 D1 1.00000000 sec  
 TDO 1

----- CHANNEL f1 -----  
 SFO1 400.1524711 MHz  
 NUC1 1H  
 P1 12.00 usec  
 PLW1 18.00000000 W

F2 - Processing parameters  
 SI 65536  
 SF 400.1500000 MHz  
 WDW EM  
 SSB 0  
 LB 0.30 Hz  
 GB 0  
 PC 1.00



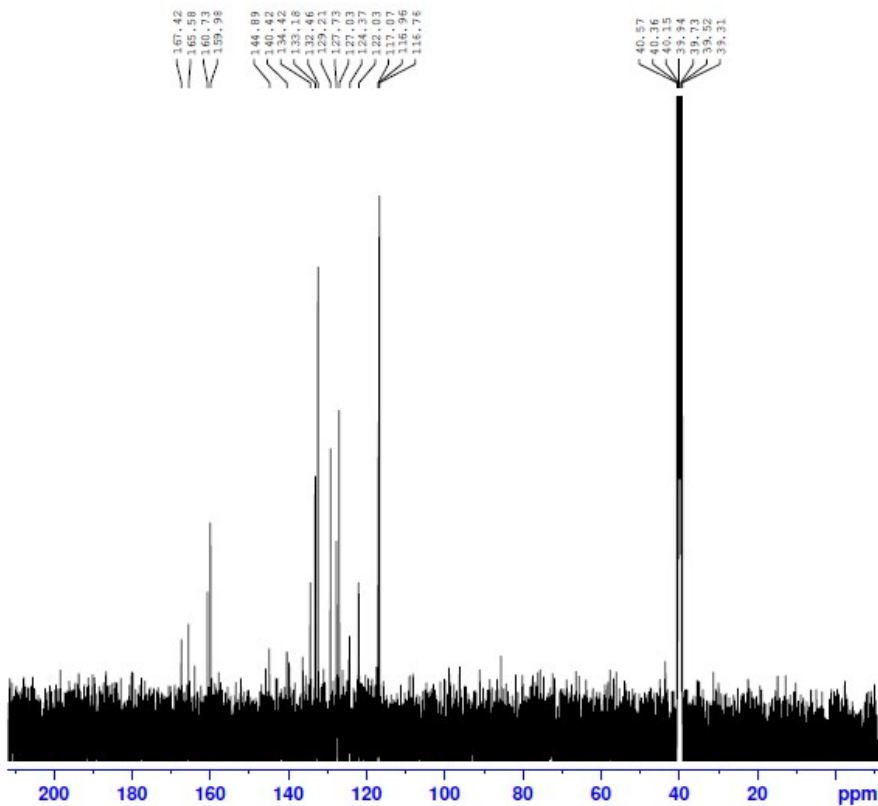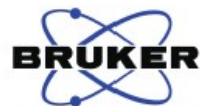

Current Data Parameters  
 NAME asma-magd-4H  
 EXPNO 2  
 PROCNO 1

F2 - Acquisition Parameters  
 Date\_ 20200504  
 Time 10.12  
 INSTRUM spect  
 PROBHD 5 mm PABBO BB/  
 PULPROG zgpg30  
 TD 65536  
 SOLVENT DMSO  
 NS 1252  
 DS 4  
 SWH 24038.461 Hz  
 FIDRES 0.366798 Hz  
 AQ 1.3631488 sec  
 RG 205.37  
 DW 20.800 usec  
 DE 6.50 usec  
 TE 300.0 K  
 D1 2.00000000 sec  
 D11 0.03000000 sec  
 TDO 1

==== CHANNEL f1 =====  
 SFO1 100.6278588 MHz  
 NUC1 13C  
 P1 10.00 usec  
 PLW1 47.00000000 W

==== CHANNEL f2 =====  
 SFO2 400.1516006 MHz  
 NUC2 1H  
 CPDPRG[2] waltz16  
 PCPD2 90.00 usec  
 PLW2 18.00000000 W  
 PLW12 0.34722000 W  
 PLW13 0.28125000 W

F2 - Processing parameters  
 SI 32768  
 SF 100.6177975 MHz  
 WDW EM  
 SSB 0  
 LB 1.00 Hz  
 GB 0  
 PC 1.40

# NMR spectrum for compound 4c

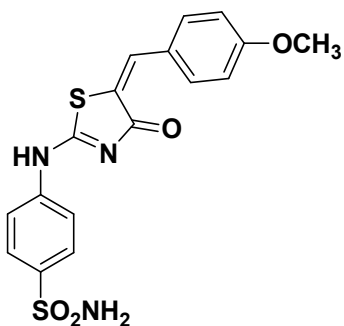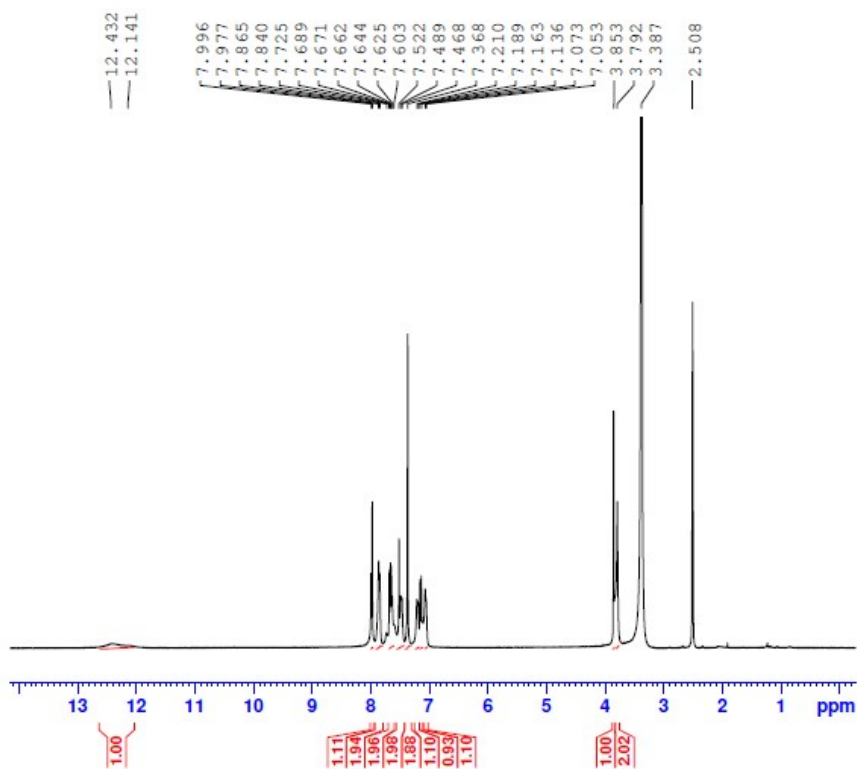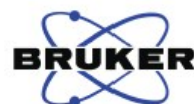

Current Data Parameters  
 NAME asmaa-magd-4c  
 EXPNO 1  
 PROCNO 1

F2 - Acquisition Parameters  
 Date\_ 20200504  
 Time 10.23  
 INSTRUM spect  
 PROBHD 5 mm PABBO BB/  
 PULPROG zg30  
 TD 65536  
 SOLVENT DMSO  
 NS 90  
 DS 2  
 SWH 8012.820 Hz  
 FIDRES 0.122266 Hz  
 AQ 4.0894465 sec  
 RG 205.37  
 DW 62.400 usec  
 DE 6.50 usec  
 TE 300.0 K  
 D1 1.00000000 sec  
 TD0 1

==== CHANNEL f1 =====  
 SFO1 400.1524711 MHz  
 NUC1 1H  
 P1 12.00 usec  
 PIN1 18.00000000 W

F2 - Processing parameters  
 SI 65536  
 SF 400.1500000 MHz  
 WSW EM  
 SSB 0  
 LB 0.30 Hz  
 GB 0  
 PC 1.00

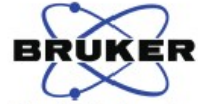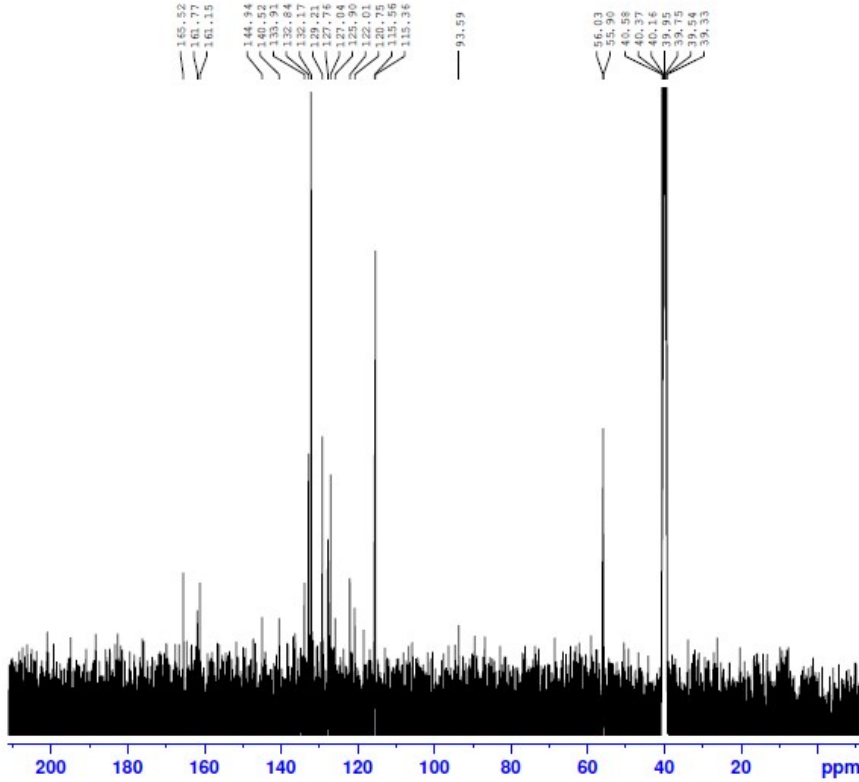

Current Data Parameters  
NAME asmaa-magd-4c  
EXPNO 2  
PROCNO 1

F2 - Acquisition Parameters  
Date\_ 20200504  
Time 13:16  
INSTRUM spect  
PROBHD 5 mm PABBO BB/  
PULPROG zgpg30  
TD 65536  
SOLVENT DMSO  
NS 3000  
DS 4  
SWH 24038.461 Hz  
FIDRES 0.366798 Hz  
AQ 1.3631488 sec  
RG 205.37  
DW 20.800 usec  
DE 6.50 usec  
TE 300.0 K  
D1 2.00000000 sec  
D11 0.03000000 sec  
TDO 1

==== CHANNEL f1 =====  
SFO1 100.6278588 MHz  
NUC1 13C  
P1 10.00 usec  
PLW1 47.00000000 W

==== CHANNEL f2 =====  
SFO2 400.1516006 MHz  
NUC2 1H  
CPCPRG[2] waltri6  
PCPD2 90.00 usec  
PLW2 18.00000000 W  
PLW12 0.34722000 W  
PLW13 0.28125000 W

F2 - Processing parameters  
SI 32768  
SF 100.6177975 MHz  
WDW EM  
SSB 0  
LB 1.00 Hz  
GB 0  
PC 1.40

# NMR Spectra for compound 4d

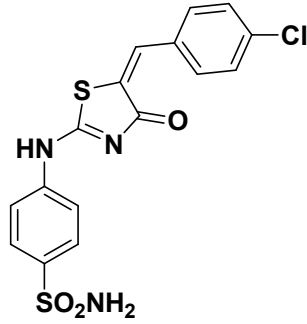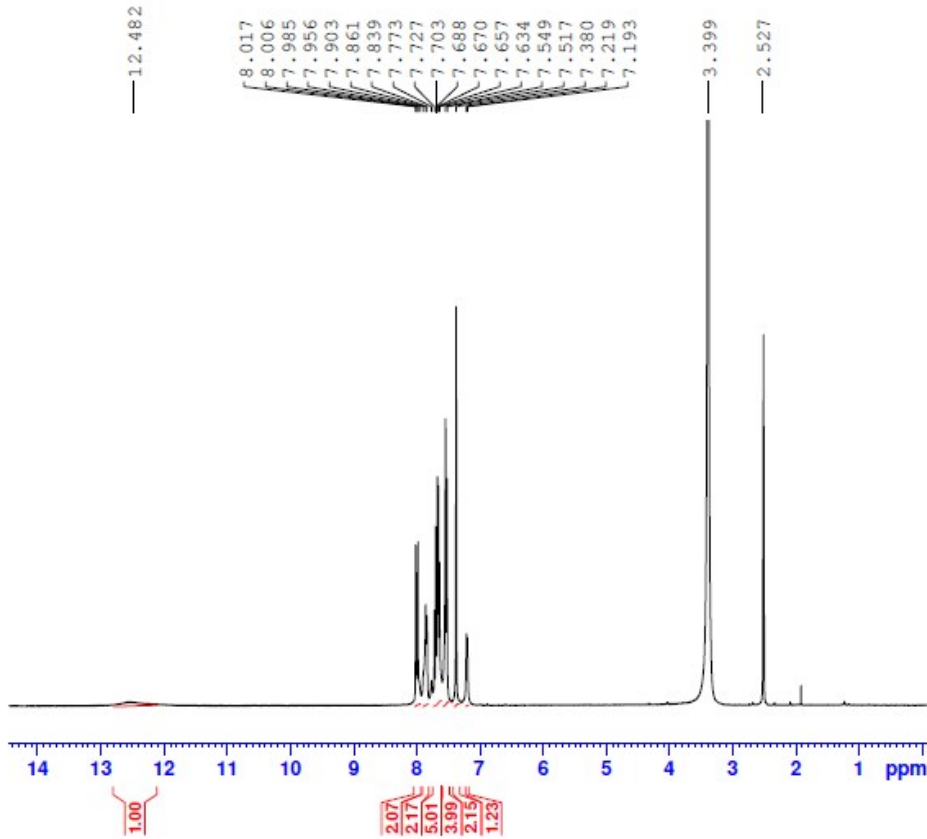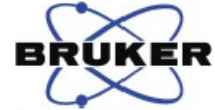

Current Data Parameters  
 NAME asmaa-magd-4b--  
 EXPNO 1  
 PROCNO 1

F2 - Acquisition Parameters  
 Date\_ 20200506  
 Time 10.03  
 INSTRUM spect  
 PROBHD 5 mm PARBO BB/  
 PULPROG zg30  
 TD 65536  
 SOLVENT DMSO  
 NS 128  
 DS 2  
 SWH 8012.820 Hz  
 FIDRES 0.122266 Hz  
 AQ 4.0894465 sec  
 RG 205.37  
 DW 62.400 usec  
 DE 6.50 usec  
 TE 300.0 K  
 D1 1.0000000 sec  
 TDO 1

==== CHANNEL f1 =====  
 SFO1 400.1524711 MHz  
 NUC1 1H  
 P1 12.00 usec  
 PLW1 18.00000000 W

F2 - Processing parameters  
 SI 65536  
 SF 400.1500000 MHz  
 WDW EM  
 SSB 0  
 LB 0.30 Hz  
 GB 0  
 PC 1.00

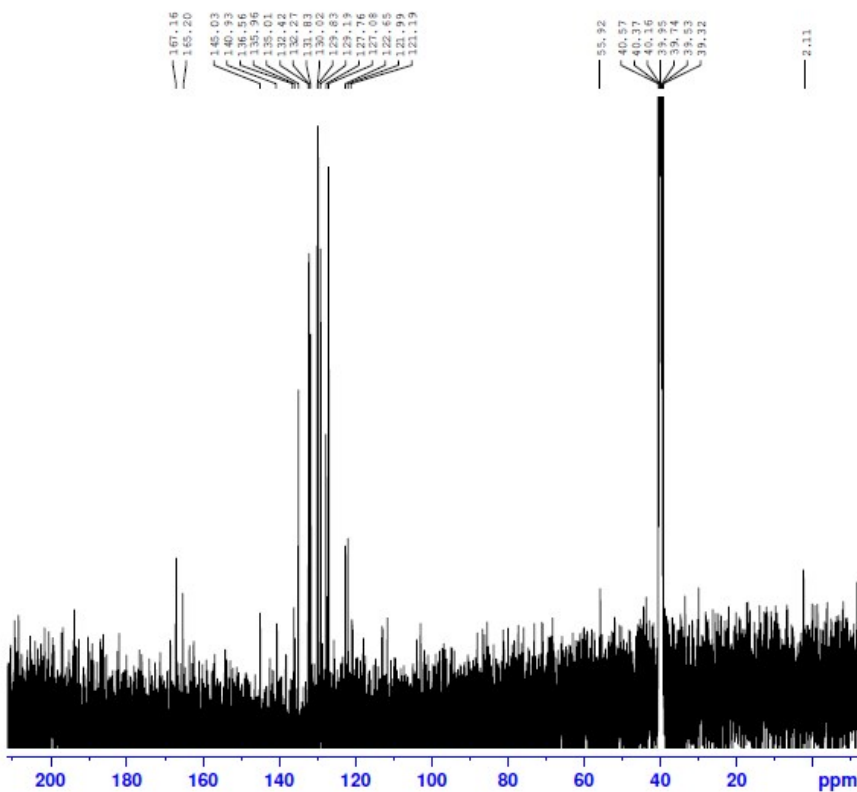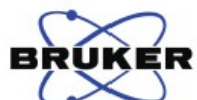

Current Data Parameters  
 NAME asma-magd-4b-  
 EXPNO 2  
 PROCNO 1

F2 - Acquisition Parameters  
 Date\_ 20200506  
 Time 12.17  
 INSTRUM spect  
 PROBHD 5 mm PAHBO BB/  
 PULPROG zgpg30  
 TD 65536  
 SOLVENT DMSO  
 NS 2314  
 DS 4  
 SWH 24038.461 Hz  
 FIDRES 0.366798 Hz  
 AQ 1.3631488 sec  
 RG 205.37  
 DW 20.800 usec  
 DE 6.50 usec  
 TE 300.0 K  
 D1 2.00000000 sec  
 D11 0.03000000 sec  
 TD0 1

==== CHANNEL f1 =====  
 SFO1 100.6278588 MHz  
 NUC1 13C  
 P1 10.00 usec  
 PLW1 47.00000000 W

==== CHANNEL F2 =====  
 SFO2 400.1516006 MHz  
 NUC2 1H  
 CPDPRG[2] waltz16  
 PCPD2 90.00 usec  
 PLW2 18.00000000 W  
 PLW12 0.34722000 W  
 PLW13 0.28125000 W

F2 - Processing parameters  
 S1 32768  
 SF 100.6177975 MHz  
 WDW EM  
 SSB 0  
 LB 1.00 Hz  
 GB 0  
 PC 1.40

# NMR Spectra for compound 4e

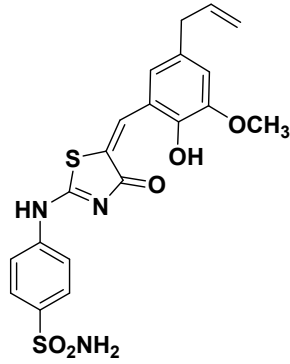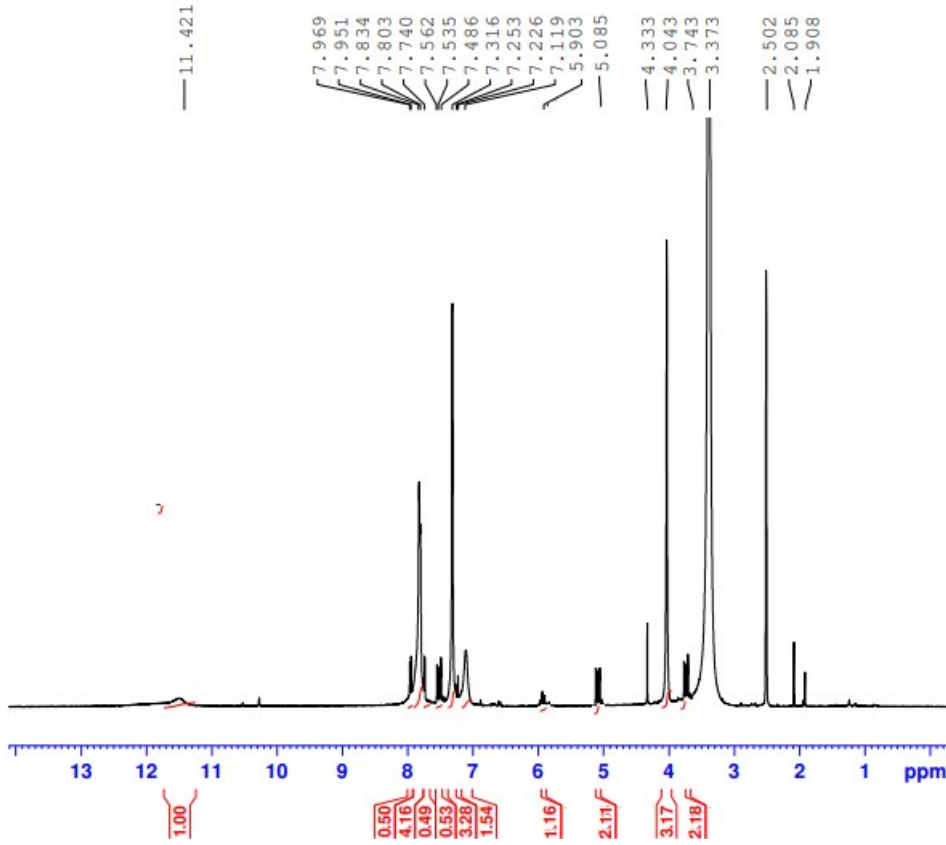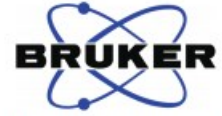

Current Data Parameters  
 NAME asmaa-magd-4j  
 EXPNO 1  
 PROCNO 1

F2 - Acquisition Parameters  
 Date\_ 20200505  
 Time 12.00  
 INSTRUM spect  
 PROBHD 5 mm PABBO BB/  
 PULPROG zg30  
 TD 65536  
 SOLVENT DMSO  
 NS 108  
 DS 2  
 SWH 8012.820 Hz  
 FIDRES 0.122266 Hz  
 AQ 4.0894465 sec  
 RG 205.37  
 DW 62.400 usec  
 DE 6.50 usec  
 TE 300.0 K  
 D1 1.00000000 sec  
 TD0 1

===== CHANNEL f1 =====  
 SFO1 400.1524711 MHz  
 NUC1 1H  
 P1 12.00 usec  
 PLW1 18.00000000 W

F2 - Processing parameters  
 SI 65536  
 SF 400.1500000 MHz  
 MDW EM  
 SSB 0  
 LB 0.30 Hz  
 GB 0  
 PC 1.00

# NMR Spectra for compound 4g

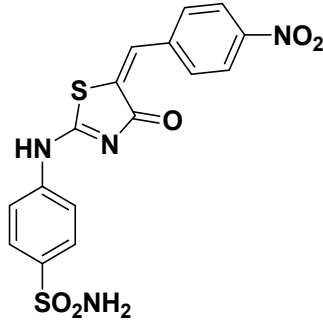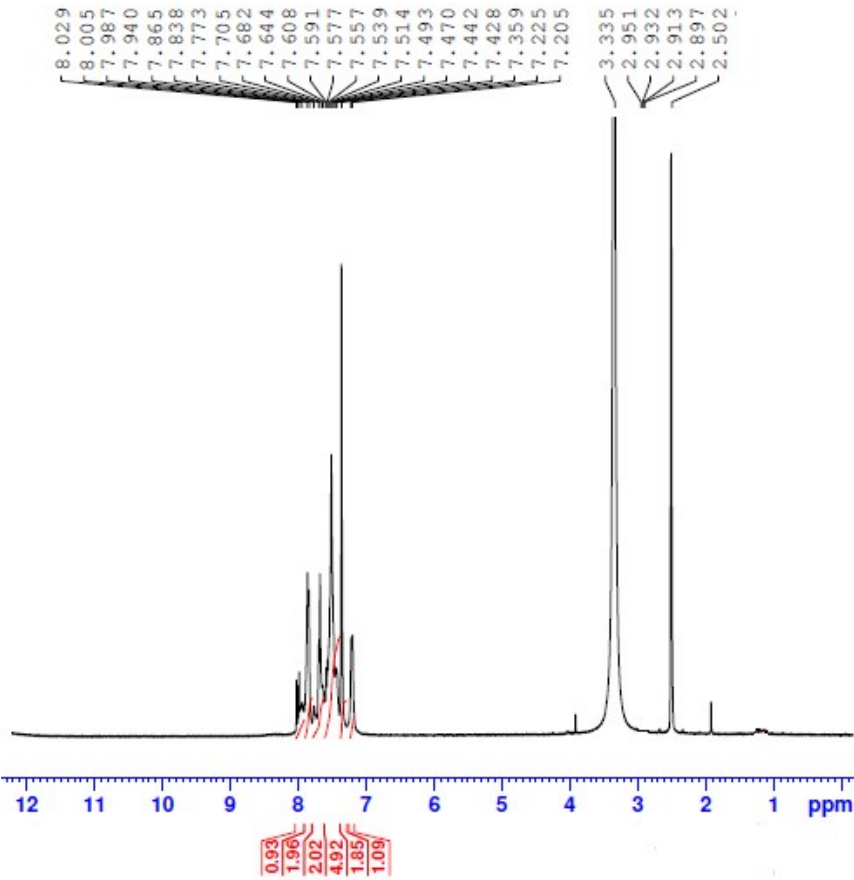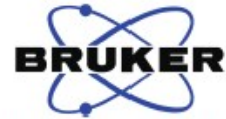

Current Data Parameters  
 NAME AMAb-3  
 EXPNO 1  
 PROCNO 1

F2 - Acquisition Parameters  
 Date\_ 20190828  
 Time 7.29  
 INSTRUM spect  
 PROBHD 5 mm PABBO BB/  
 PULPROG zg30  
 TD 65536  
 SOLVENT DMSO  
 NS 64  
 DS 2  
 SWH 8012.820 Hz  
 FIDRES 0.122266 Hz  
 AQ 4.0894465 sec  
 RG 205.37  
 DW 62.400 usec  
 DE 6.50 usec  
 TE 300.0 K  
 D1 1.0000000 sec  
 TDO 1

==== CHANNEL f1 =====  
 SFO1 400.1524711 MHz  
 NUC1 1H  
 P1 12.00 usec  
 PLW1 18.0000000 W

F2 - Processing parameters  
 SI 65536  
 SF 400.1500000 MHz  
 WDW EM  
 SSB 0  
 LB 0.30 Hz  
 GB 0  
 PC 1.00

# NMR Spectra for compound 4h

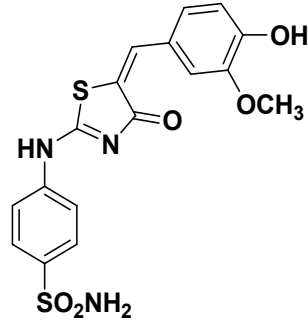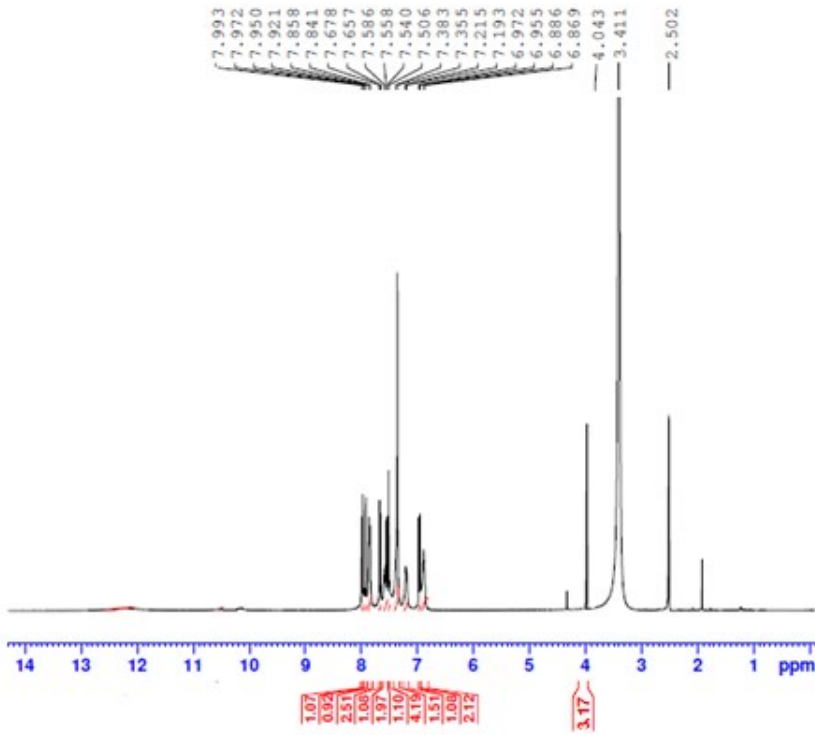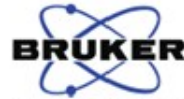

```

Current Data Parameters
NAME      asmas-magd-4f
EXPNO    1
PROCNO   1

F2 - Acquisition Parameters
Date_    20200504
Time     14.08
INSTRUM  spect
PROBHD   5 mm PABBO BB/
PULPROG  zg30
TD        65536
SOLVENT  DMSO
NS        128
DS        2
SWH       8012.820 Hz
FIDRES    0.122266 Hz
AQ         4.0894465 sec
RG         209.37
DM         62.400 usec
DE         6.50 usec
TE         300.0 K
D1         1.00000000 sec
TDO        1

===== CHANNEL f1 =====
SPD1      400.1524711 MHz
NUC1      1H
P1        12.00 usec
P1M1      18.00000000 M

F2 - Processing parameters
SI        65536
SF        400.1500000 MHz
WDW       EM
SSB       0
LB        0.30 Hz
GB        0
PC        1.00
    
```
